# Supplementary material
Source: Springer Nature journal article supplement (https://www.springermedizin.de/resource/supplementary/12876_2008_286_MOESM1_ESM.pdf/9439088)

Plasma Pentraxin3 (ng/ml)

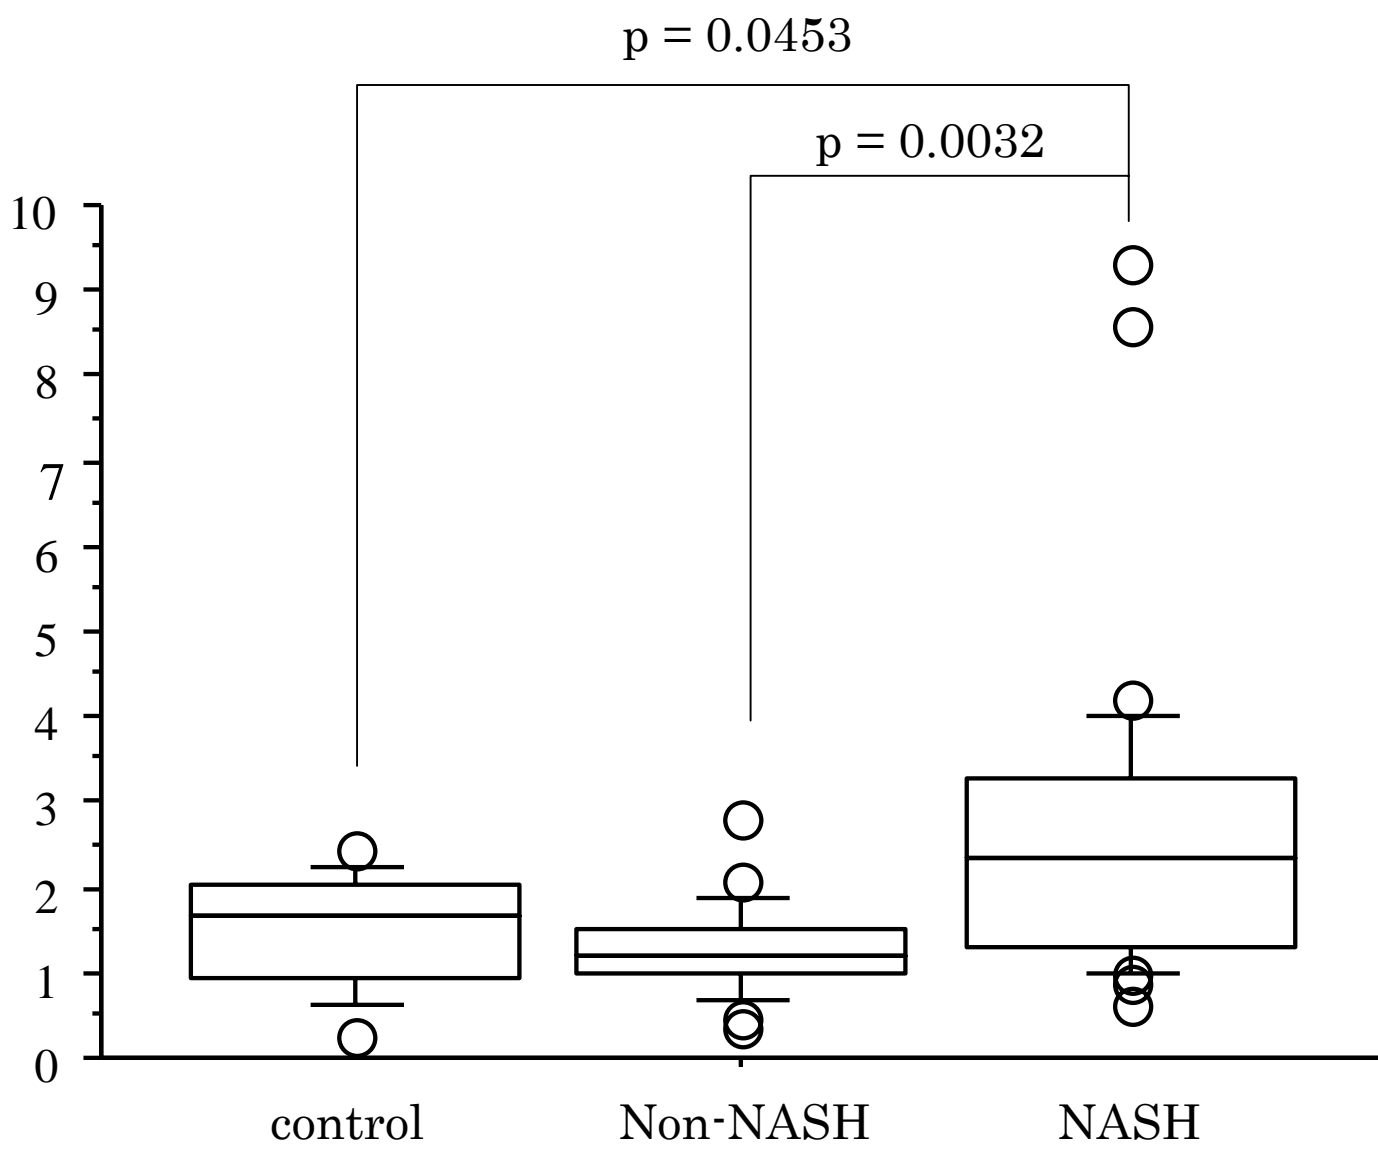

Supplement: MOESM1 [file 9439088]
